# Supplementary material for: Neptunium and Uranium Interactions with Environmentally and Industrially Relevant Iron Minerals
Source: MDPI journal article supplement (doi:10.3390/min12020165), 2022-01-28
Supplement: s1 [file s1]

Archive with 1 entries (1 files):
- minerals-1577220-supplementary.pdf
